# Supplementary material
Source: PubMed Central journal article supplement (PMC6688175)
Supplement: NIHMS1026447-supplement-Supplemental.pdf [file NIHMS1026447-supplement-Supplemental.pdf]

## Appendix A

### Search strategy: Alexithymia and chronic pain systematic review

#### PsycINFO

1. Exp Pain/
2. Exp Arthritis/
3. (chronic\* adj3 pain\*)
4. (recurrent\* adj3 pain\*)
5. (persistent\* adj3 pain\*)
6. (long-term or long term adj3 pain\*)
7. Pain\*.mp
8. (Cancer\* adj3 pain\*)
9. (Musculoskeletal adj3 pain\*)
10. 1 or 2 or 3 or 4 or 5 or 6 or 7 or 8 or 9
11. Exp Alexithymia/
12. Alexithym\*
13. 11 or 12
14. 10 and 13

#### EMBASE

1. Exp Pain/
2. Exp Arthritis/
3. Exp Fibromyalgia/
4. (chronic\* adj3 pain\*)
5. (recurrent\* adj3 pain\*)
6. (persistent\* adj3 pain\*)
7. (long-term or long term adj3 pain\*)
8. Pain\*.mp
9. 1 or 2 or 3 or 4 or 5 or 6 or 7 or 8
10. Exp Alexithymia/
11. Alexithym\*
12. 10 or 11
13. 9 and 12

#### Medline

1. Exp pain/
2. Exp headache disorders/
3. Exp Fibromyalgia
4. Exp arthritis
5. (chronic\* adj3 pain\*)
6. (recurrent\* adj3 pain\*)
7. (persistent\* adj3 pain\*)
8. (long-term or long term adj3 pain\*)
9. Pain\*.mp

10. Headache.mp.
11. Fibromyalgia.mp.
12. OR/ (#1-7)
13. Exp affective symptoms
14. Alexithym\*
15. 8 OR 9
16. 7 AND 10
